# Supplementary material for: Consensus versus Individual QSARs in Classification: Comparison on a Large-Scale Case Study
Source: PubMed Central journal article supplement (PMC7997107; doi:10.1021/acs.jcim.9b01057), 2020-02-19
Supplement: ci9b01057_si_001.pdf [file ci9b01057_si_001.pdf]

## Supporting Information:

# Consensus versus individual QSARs in classification: comparison on a large-scale case study

*Cecile Valsecchi<sup>1</sup>, Francesca Grisoni<sup>2</sup>, Viviana Consonni<sup>1</sup>, Davide Ballabio<sup>1\*</sup>*

<sup>1</sup> Milano Chemometrics and QSAR Research Group, University of Milano Bicocca, P.za della Scienza 1-20126, Milano, Italy

<sup>2</sup> ETH Zurich, Department of Chemistry and Applied Biosciences, Vladimir-Prelog-Weg 4, 8049 Zurich, Switzerland

### Corresponding Author

\*davide.ballabio@unimib.it

**Table S1.** Classification performances of the individual models (as labelled in <sup>1</sup>) on the binding evaluation set. For each model, sensitivity (Sn) and specificity (Sp) of the active class, non-error-rate (NER) and coverage (Cvg) are reported.

| ID | Binding models | Sn (%) | Sp (%) | NER (%) | Cvg (%) |
|----|----------------|--------|--------|---------|---------|
| 1  | ATSDR_IRFMN_1  | 33.7   | 97.5   | 65.6    | 97.9    |
| 2  | ATSDR_IRFMN_2  | 54.7   | 92.1   | 73.4    | 96.9    |
| 3  | ATSDR_IRFMN_3  | 70.1   | 81.6   | 75.9    | 99.8    |
| 4  | DTU            | 66.1   | 94.2   | 80.1    | 69.0    |

|    |             |      |      |      |      |
|----|-------------|------|------|------|------|
| 5  | ECUST       | 27.5 | 96.8 | 62.2 | 96.5 |
| 6  | EPA_NCCT_1  | 40.8 | 94.9 | 67.8 | 99.4 |
| 7  | EPA_NCCT_2  | 70.7 | 81.6 | 76.2 | 98.4 |
| 8  | EPA_NCCT_3  | 34.0 | 98.9 | 66.5 | 80.5 |
| 9  | EPA_NRMRL_1 | 67.3 | 77.6 | 72.5 | 99.0 |
| 10 | EPA_NRMRL_2 | 53.9 | 87.8 | 70.9 | 99.7 |
| 11 | FDA_HHS     | 69.1 | 84.1 | 76.6 | 100  |
| 12 | IBMC_1      | 64.2 | 87.5 | 75.9 | 99.9 |
| 13 | IBMC_2      | 75.7 | 80.0 | 77.8 | 99.9 |
| 14 | IDEA        | 58.0 | 99.4 | 78.7 | 99.9 |
| 15 | INS_LA      | 60.6 | 89.3 | 74.9 | 100  |
| 16 | Jussieu     | 31.6 | 88.9 | 60.3 | 100  |
| 17 | LM          | 74.5 | 80.5 | 77.5 | 58.6 |
| 18 | MNegri      | 32.6 | 93.7 | 63.2 | 100  |
| 19 | NCATS_1     | 64.0 | 97.7 | 80.9 | 13.0 |
| 20 | NCATS_2     | 21.9 | 99.8 | 60.8 | 93.0 |
| 21 | NCSTATE     | 42.6 | 96.8 | 69.7 | 100  |
| 22 | SWETOX_1    | 72.5 | 81.8 | 77.2 | 91.9 |
| 23 | SWETOX_2    | 73.7 | 80.1 | 76.9 | 95.7 |
| 24 | TARTU_1     | 71.3 | 79.0 | 75.2 | 100  |
| 25 | TARTU_2     | 68.6 | 79.9 | 74.3 | 100  |
| 26 | TUM         | 29.4 | 98.1 | 63.8 | 100  |
| 27 | UFG         | 51.3 | 82.8 | 67.0 | 83.7 |
| 28 | UMEA        | 71.4 | 99.5 | 85.5 | 43.7 |
| 29 | UNC         | 71.9 | 77.5 | 74.7 | 96.4 |
| 30 | UNIBARI     | 33.0 | 93.9 | 63.4 | 67.8 |

|    |               |      |      |      |      |
|----|---------------|------|------|------|------|
| 31 | UNIMIB_1      | 81.7 | 86.0 | 83.8 | 60.7 |
| 32 | UNIMIB_2      | 73.2 | 79.8 | 76.5 | 93.3 |
| 33 | UNISTRA       | 44.3 | 99.6 | 71.9 | 64.9 |
| 34 | VCCLAB        | 73.8 | 83.2 | 78.5 | 95.4 |
|    | <b>Mean</b>   | 56.8 | 88.9 | 72.8 | 88.1 |
|    | <b>Min</b>    | 21.9 | 77.5 | 60.3 | 13.0 |
|    | <b>Max</b>    | 81.7 | 99.8 | 85.5 | 100  |
|    | <b>Median</b> | 64.1 | 88.3 | 74.8 | 97.4 |

**Table S2** Classification performances of the individual models (as labelled in <sup>1</sup>) on the agonism evaluation set. For each model, sensitivity (Sn) and specificity (Sp) of the active class, non-error-rate (NER) and coverage (Cvg) are reported.

| <b>ID</b> | <b>Agonism models</b> | <b>Sn (%)</b> | <b>Sp (%)</b> | <b>NER (%)</b> | <b>Cvg (%)</b> |
|-----------|-----------------------|---------------|---------------|----------------|----------------|
| 1         | DTU                   | 77.3          | 97.8          | 87.5           | 81.4           |
| 2         | EPA_NRMRL_1           | 79.5          | 76.4          | 77.9           | 97.0           |
| 3         | EPA_NRMRL_2           | 71.2          | 97.6          | 84.4           | 99.0           |
| 4         | FDA_HHS               | 76.2          | 95.5          | 85.8           | 100            |
| 5         | IBMC_1                | 74.4          | 94.9          | 84.6           | 99.8           |
| 6         | IBMC_2                | 78.7          | 81.2          | 79.9           | 99.9           |
| 7         | INS_LA                | 73.8          | 97.1          | 85.4           | 100            |
| 8         | Jussieu               | 32.9          | 96.3          | 64.6           | 100            |
| 9         | LM                    | 81.3          | 96.3          | 88.8           | 59.7           |
| 10        | NCATS_1               | 85.9          | 98.3          | 92.1           | 12.3           |
| 11        | NCATS_2               | 51.8          | 99.9          | 75.8           | 97.3           |
| 12        | NCSTATE               | 67.7          | 99.4          | 83.5           | 100            |
| 13        | SWETOX_1              | 79.0          | 83.3          | 81.2           | 97.8           |
| 14        | SWETOX_2              | 77.8          | 85.3          | 81.6           | 96.6           |
| 15        | TARTU_1               | 75.6          | 92.0          | 83.8           | 100            |
| 16        | TARTU_2               | 77.4          | 89.4          | 83.4           | 100            |
| 17        | TUM                   | 75.0          | 91.9          | 83.4           | 100            |
| 18        | UFG                   | 83.7          | 82.2          | 82.9           | 84.5           |
| 19        | UMEA                  | 81.3          | 97.9          | 89.6           | 79.7           |
| 20        | UNISTRA               | 71.4          | 99.9          | 85.6           | 80.3           |
| 21        | VCCLAB                | 74.4          | 98.0          | 86.2           | 95.2           |
|           | <b>Mean</b>           | 73.6          | 92.9          | 83.2           | 89.5           |

|  |               |      |      |      |      |
|--|---------------|------|------|------|------|
|  | <b>Min</b>    | 32.9 | 76.4 | 64.6 | 12.3 |
|  | <b>Max</b>    | 85.9 | 99.9 | 92.1 | 100  |
|  | <b>Median</b> | 76.2 | 96.3 | 83.8 | 97.8 |

**Table S3** Classification performances of the individual models (as labelled in <sup>1</sup>) on the antagonism evaluation set. For each model, sensitivity (Sn) and specificity (Sp) of the active class, non-error-rate (NER) and coverage (Cvg) are reported.

| <b>ID</b> | <b>Antagonism models</b> | <b>Sn (%)</b> | <b>Sp (%)</b> | <b>NER (%)</b> | <b>Cvg (%)</b> |
|-----------|--------------------------|---------------|---------------|----------------|----------------|
| 1         | DTU                      | 53.6          | 93.4          | 73.5           | 67.8           |
| 2         | EPA_NCCT_1               | 35.1          | 94.6          | 64.9           | 98.3           |
| 3         | EPA_NCCT_2               | 68.1          | 79.3          | 73.7           | 97.4           |
| 4         | EPA_NRMRL_1              | 70.1          | 76.1          | 73.1           | 98.1           |
| 5         | EPA_NRMRL_2              | 57.4          | 84.7          | 71.0           | 99.0           |
| 6         | FDA_HHS                  | 64.6          | 83.3          | 74.0           | 100            |
| 7         | IBMC_1                   | 55.7          | 86.3          | 71.0           | 99.9           |
| 8         | IBMC_2                   | 77.1          | 76.4          | 76.8           | 99.8           |
| 9         | INS_LA                   | 56.1          | 87.3          | 71.7           | 100            |
| 10        | Jussieu                  | 41.7          | 86.3          | 64.0           | 100            |
| 11        | LM                       | 68.8          | 77.5          | 73.1           | 57.6           |
| 12        | NCATS                    | 20.7          | 99.0          | 59.8           | 13.2           |
| 13        | NCSTATE                  | 29.3          | 96.4          | 62.9           | 100            |
| 14        | SWETOX_1                 | 71.6          | 78.9          | 75.3           | 99.3           |
| 15        | SWETOX_2                 | 64.3          | 79.7          | 72.0           | 96.6           |
| 16        | TARTU_1                  | 56.7          | 80.3          | 68.5           | 100            |
| 17        | TARTU_2                  | 65.0          | 78.6          | 71.8           | 100            |
| 18        | TUM                      | 43.9          | 88.1          | 66.0           | 100            |
| 19        | UFG                      | 52.5          | 77.7          | 65.1           | 91.1           |
| 20        | UMEA                     | 45.7          | 96.2          | 71.0           | 54.5           |
| 21        | UNISTRA                  | 20.4          | 99.0          | 59.7           | 70.0           |
| 22        | VCCLAB                   | 46.0          | 88.3          | 67.2           | 95.2           |
|           | <b>Mean</b>              | 52.9          | 85.8          | 69.4           | 88.1           |

|  |               |      |      |      |      |
|--|---------------|------|------|------|------|
|  | <b>Min</b>    | 20.4 | 76.1 | 59.7 | 13.2 |
|  | <b>Max</b>    | 77.1 | 99.0 | 76.8 | 100  |
|  | <b>Median</b> | 55.9 | 85.5 | 71.0 | 98.6 |

**Table S4** Summary of the molecules which were considered outside the applicability domain or misclassified by all the individual QSAR models. FPs and FNs stand for false positive and false negatives, respectively. Number of FN molecules with concentration of half maximal activity ( $AC_{50}$ ) above 20  $\mu$ M (borderline compounds) and with at least a correspondent inactive neutralized form are listed.

|                   | FNs                  |                                                   |        |       | FPs   |
|-------------------|----------------------|---------------------------------------------------|--------|-------|-------|
|                   | Borderline compounds | Differences between charged and neutralized forms | others | Total | Total |
| <b>Binding</b>    | 12                   | 2                                                 | 5      | 19    | 0     |
| <b>Antagonism</b> | 14                   | 1                                                 | 10     | 25    | 12    |
| <b>Agonism</b>    | 3                    | 6                                                 | 16     | 25    | 3     |



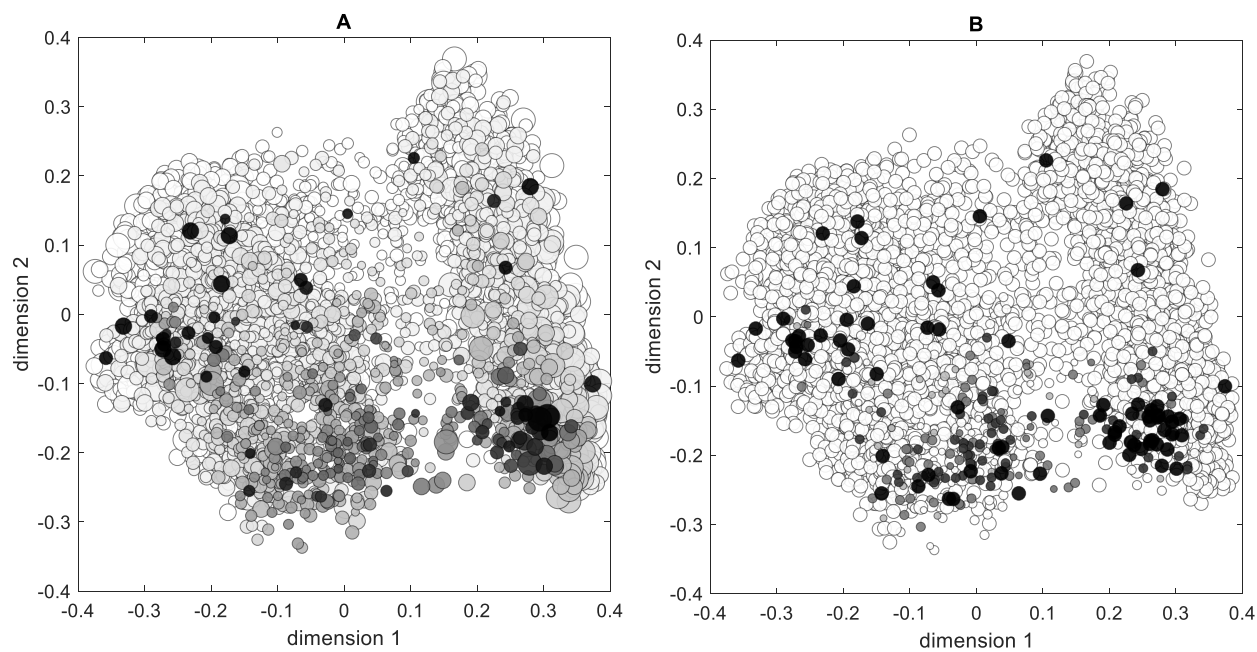

**Figure S1.** Plot of first and second multidimensional scaling dimensions for the agonism set; each point represents one chemical and it is colored on a grey scale representing the degree of misclassifications (A) of individual QSAR models and (B) of consensus strategies (the darker, the higher the number of misclassifications). The size of each point is proportional to the percentage of models (A) or consensus strategies (B) that provided a reliable prediction for the chemical.

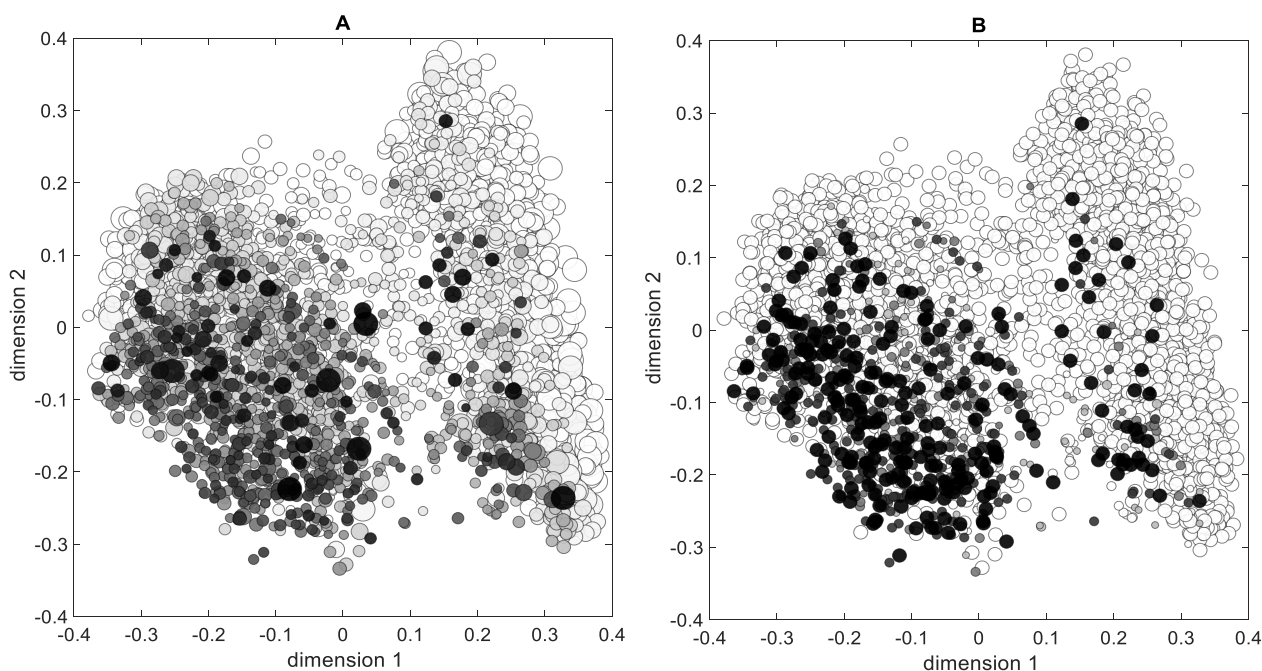

**Figure S2.** Plot of first and second multidimensional scaling dimensions for the antagonism set; each point represents one chemical and it is colored on a grey scale representing the degree of misclassifications (A) of individual QSAR models and (B) of consensus strategies (the darker, the higher the number of misclassifications). The size of each point is proportional to the percentage of models (A) or consensus strategies (B) that provided a reliable prediction for the chemical.

(1) Mansouri, K.; Kleinstreuer, N.; Abdelaziz, A.; Alberga, D.; Alves, V. M.; Andersson, Pa. L.; Andrade, C. H.; Bai, F.; Balabin, I.; Ballabio, D.; Wedebye, E. B.; Benfenati, E.; Bhatarai, B.; Boyer, S.; Chen, J.; Consonni, V.; Farag, S.; Fourches, D.; Garcia-Sosa, A. T.; Gramatica, P.; Grisoni, F.; Grulke, C. M.; Hong, H.; Horvath, D.; Hu, X.; Huang, R.; Jeliaskova, N.; Li, J.; Li, X.; Liu, H.; Manganelli, S.; Mangiatordi, G.; Maran, U.; Marcou, G.; Martin, T.; Muratov, E.; Nguyen, D.; Nicolotti, O.; Nikolov, G. N.; Norinder, U.; Papa, E.; Petitjean, M.; Piir, G.; Poroikov, V.; Qiao, X.; Richard, A. M.; Roncaglioni, A.; Ruiz, P.; Rupakheti, C.; Sakkiah, S.; Sangion, A.; Schramm, K.; Selvaraj, C.; Shah, I.; Sild, S.; Sun, L.; Taboureau, O.; Tang, Y.; Tetko, I.; Todeschini, R.; Tong, W.; Trisciuzzi, D.; Tropsha, A.; VanDenDriessche, G.; Varnek, A.; Wang, Z.; Williams, A. J.; Xie, H.; Zakharov, A.; Zheng, Z.; Judson, R. S. CoMPARA: Collaborative Modeling Project for Androgen Receptor Activity. *Environ. Health Perspect.* **2020**, *128*(2), 027002/1-17. <https://doi.org/10.1289/EHP5580>.
